# Supplementary material for: Methods and uncertainty estimations of 3-D structural modelling in crystalline rocks: a case study
Source: Copernicus journal article supplement (doi:10.5194/se-8-987-2017), 2017-09-28
Supplement: Supplementary file 1 [file se-8-987-2017-supplement.pdf]

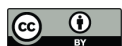

*Supplement of*

## **Methods and uncertainty estimations of 3-D structural modelling in crystalline rocks: a case study**

**Raphael Schneeberger et al.**

*Correspondence to:* Raphael Schneeberger ([raphael.schneeberger@geo.unibe.ch](mailto:raphael.schneeberger@geo.unibe.ch))

The copyright of individual parts of the supplement might differ from the CC BY 3.0 License.

## 1 Pseudo-Code: Bentley-Ottmann Algorithm

```
2 Initialize event queue EQ = all segment endpoints;
3     Sort EQ by increasing x and y;
4     Initialize sweep line SL to be empty;
5     Initialize output intersection list IL to be empty;
6
7     While (EQ is nonempty) {
8         Let E = the next event from EQ;
9         If (E is a left endpoint) {
10             Let segE = E's segment;
11             Add segE to SL;
12             Let segA = the segment Above segE in SL;
13             Let segB = the segment Below segE in SL;
14             If (I = Intersect( segE with segA) exists)
15                 Insert I into EQ;
16             If (I = Intersect( segE with segB) exists)
17                 Insert I into EQ;
18         }
19         Else If (E is a right endpoint) {
20             Let segE = E's segment;
21             Let segA = the segment Above segE in SL;
22             Let segB = the segment Below segE in SL;
23             Delete segE from SL;
24             If (I = Intersect( segA with segB) exists)
25                 If (I is not in EQ already)
26                     Insert I into EQ;
27         }
28         Else { // E is an intersection event
29             Add E's intersect point to the output list IL;
30             Let segE1 above segE2 be E's intersecting segments in SL;
31             Swap their positions so that segE2 is now above segE1;
32             Let segA = the segment above segE2 in SL;
33             Let segB = the segment below segE1 in SL;
```

```
34         If (I = Intersect(segE2 with segA) exists)
35             If (I is not in EQ already)
36                 Insert I into EQ;
37         If (I = Intersect(segE1 with segB) exists)
38             If (I is not in EQ already)
39                 Insert I into EQ;
40     }
41     remove E from EQ;
42 }
43 return IL;
44 }
45
```

# 3D structural model of the GTS



# 3D structural model using Delaunay triangulation

# 3D structural model using the ribbon tool

# 3D structural model using field data
